# Supplementary material for: The Virtual Apple Core of a Colonic Carcinoma
Source: Atypon-hosted journal article supplement (doi:10.1056/nejmicm040235), 2005-06-29

## Supplementary Appendix

This appendix has been provided by the authors to give readers additional information about their work.

Supplement to: Rubin EM, Raptopoulos VD. The virtual apple core of a colonic carcinoma. *N Engl J Med* 2005;352:2733.

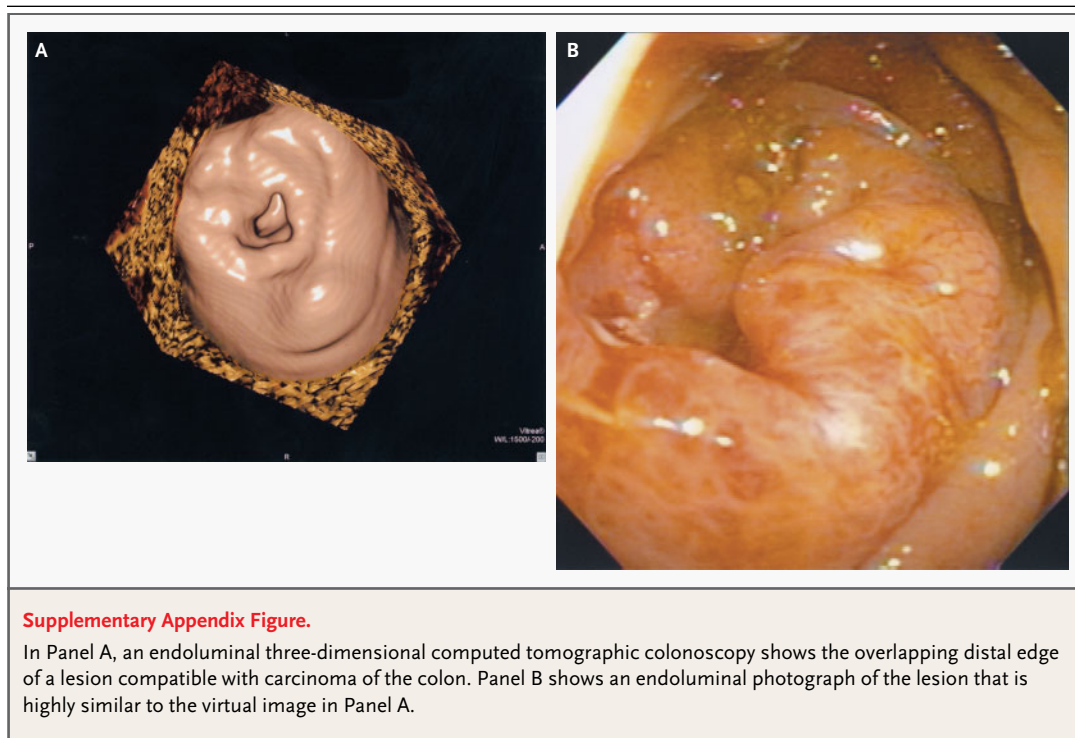

Supplement: nejm_rubin_2733sa1.pdf [file nejm_rubin_2733sa1.pdf]
